# Supplementary material
Source: MDPI journal article supplement (https://www.mdpi.com/2073-4352/11/2/169)
Supplement: s1 [file s1]

## Supplementary Information

# Broadband detection based on 2D Bi<sub>2</sub>Se<sub>3</sub>/ZnO nanowire heterojunction

Zhi Zeng<sup>1,2</sup>, Dongbo Wang<sup>1,2\*</sup>, Jinzhong Wang<sup>1,2\*</sup>, Shujie Jiao<sup>1,2\*</sup>, DongHao Liu<sup>1,2</sup>, BingKe Zhang<sup>1,2</sup>, ChenChen Zhao<sup>1,2</sup>, YangYang Liu<sup>1,2</sup>, YaXin Liu<sup>1,2</sup>, ZhiKun Xu<sup>3,4\*</sup>, Xuan Fang<sup>5,\*</sup> and Liancheng Zhao<sup>1,2</sup>

\*Email: [wangdongbo@hit.edu.cn](mailto:wangdongbo@hit.edu.cn)

In the low magnification SEM observation of ZnO, it can be seen that synthesized ZnO nanowires have fully covered the substrate with uniform distribution. In the high magnification image of Fig.S1b, the uniform orientation of ZnO nanowire arrays could also be observed clearly. In SEM image of Bi<sub>2</sub>Se<sub>3</sub>, the even and flat CVD synthesized Bi<sub>2</sub>Se<sub>3</sub> film could be observed and the characterization of AFM could also support this conclusion.

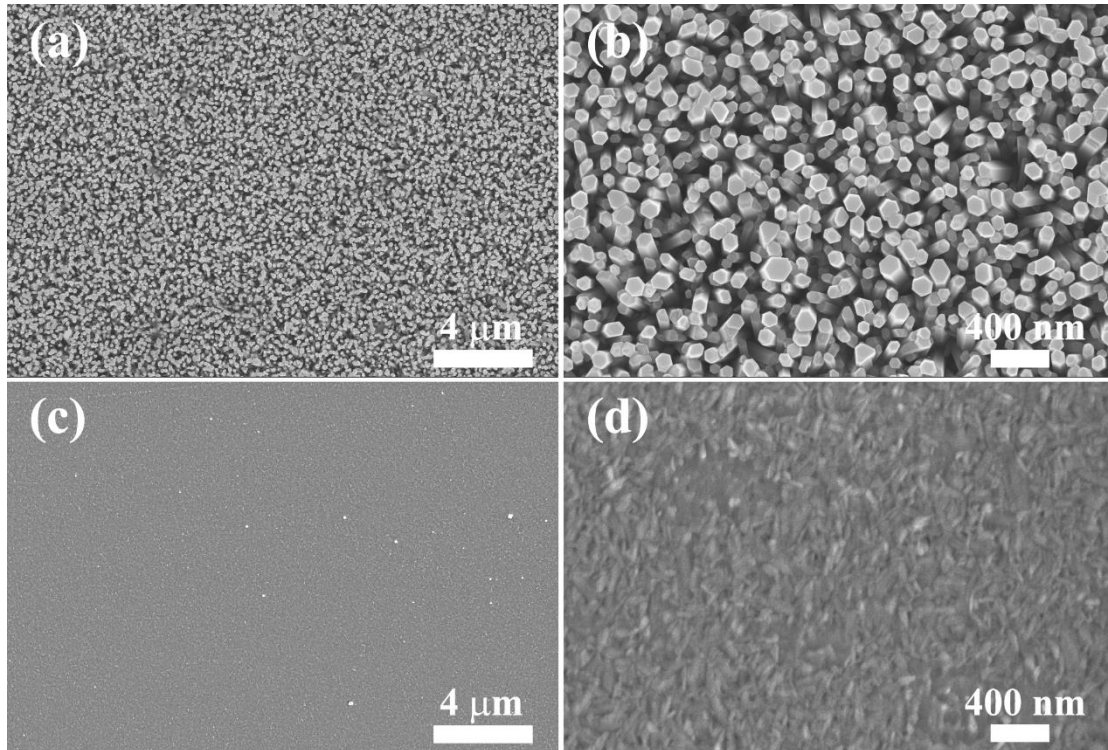

**Fig. S1.** (a) low magnification and (b) high magnification SEM images of ZnO NWAs; (c) low magnification and (d) high magnification SEM images of Bi<sub>2</sub>Se<sub>3</sub>;

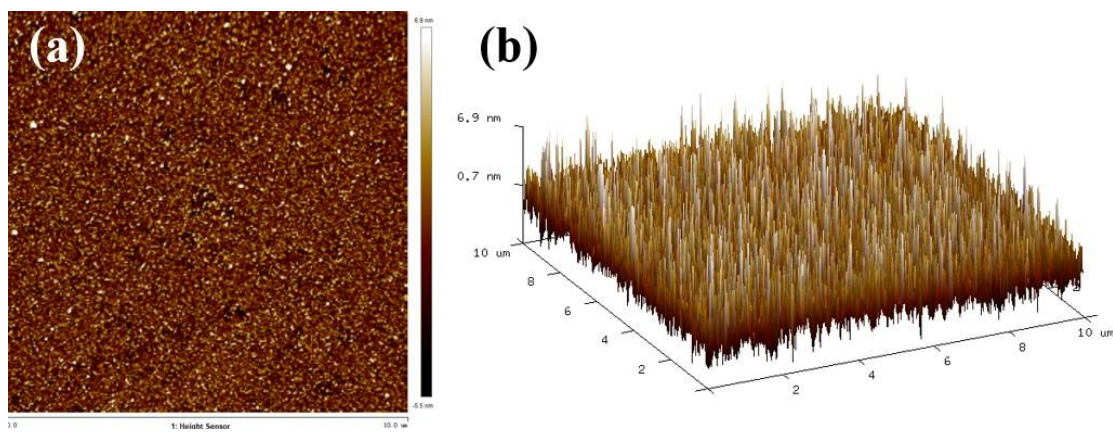

**Fig.S2.** (a) 2D and (b) 3D AFM images of Bi<sub>2</sub>Se<sub>3</sub>;X
